# Supplementary material for: LncRNA SRA promotes hepatic steatosis through repressing the expression of adipose triglyceride lipase (ATGL)
Source: PubMed Central journal article supplement (PMC5069493; doi:10.1038/srep35531), 2016-10-19

**LncRNA SRA promotes hepatic steatosis through repressing expression of adipose triglyceride lipase (ATGL)**

Gang Chen<sup>1#</sup> and Dongsheng Yu<sup>2#</sup>, Xue Nian<sup>2</sup>, Junyi Liu<sup>3</sup>, Ronald J. Koenig<sup>4</sup>, Bin Xu<sup>4\*</sup> and Liang Sheng<sup>2\*</sup>

1 Department of Hepatobiliary Surgery, The First Affiliated Hospital, Wenzhou Medical University, Wenzhou 325000, China

2 Department of Pharmacology, School of Basic Medical Science, Nanjing Medical University, 140 Hanzhong Rd., Nanjing, Jiangsu, 210029, China

3 Department of Chemical Biology, School of Pharmaceutical Sciences, Peking University, Beijing 100191, China

4 Department of Internal Medicine, Division of Metabolism, Endocrinology and Diabetes, University of Michigan Medical Center, Ann Arbor, MI 48109-5678

\*Corresponding authors: Liang Sheng, PhD.

Department of Pharmacology, School of Basic Medical Science,  
Nanjing Medical University,  
140 Hanzhong Rd., Nanjing, Jiangsu, 210029, China  
Email: [lgsheng@njmu.edu.cn](mailto:lgsheng@njmu.edu.cn)  
Phone: +86 13913007736  
Fax: +86 83237637

Bin Xu, Ph.D.

Department of Internal Medicine, Division of Metabolism, Endocrinology  
and Diabetes, University of Michigan Medical Center,  
Ann Arbor, MI 48109-5678  
Email: [bxu@umich.edu](mailto:bxu@umich.edu)  
Phone: 734-647-2883  
Fax: 734-936-6684

#These authors contributed equally to this work.

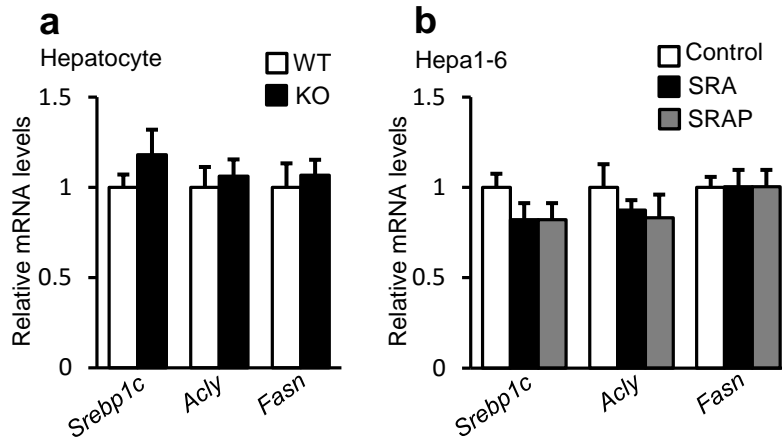

**Supplementary Figure S1. Loss or overexpression of SRA does not affect the expression of Srebp1c, Acly or Fasn in hepatocytes.**

(a) The mRNA levels of Srebp1c, Acly and Fasn in primary hepatocytes isolated from SRAKO (KO, n=8) or WT (n=8) littermates (7-8 weeks of age, chow diet) were analyzed by RT-qPCR. (b) Hepa1-6 cells were transfected with pSCT (Control), pSCT-SRA (SRA) or pSCT-SRAP-SDM1/7 (SRAP) expression vectors, and subsequent assays were performed 60 h after transfection. The mRNA levels of Srebp1c, Acly and Fasn were analyzed by RT-qPCR and normalized to 36B4. The data are expressed as fold-change relative to control and presented as the mean  $\pm$  SE. \*p < 0.05.

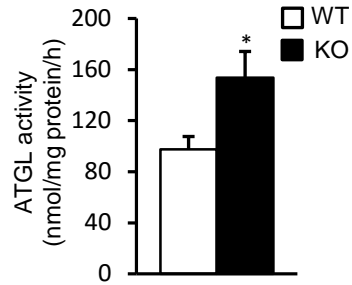

**Supplementary Figure S2. Loss of SRA enhances ATGL activity in liver.** Liver lysates from SRAKO (KO, n=8) or WT (n=8) mice (20 weeks of age, chow diet) were analyzed for TAG hydrolase activity normalized by liver lysate protein levels. ATGL activity was calculated as the difference between TAG hydrolase activity in the presence and absence of the ATGL inhibitor, (R)-bromo-enol lactone (25  $\mu$ M), i.e. TAG hydrolase activity suppressible with (R)-bromo-enol lactone. The data are presented as the mean  $\pm$  SE. \* $p < 0.05$ .

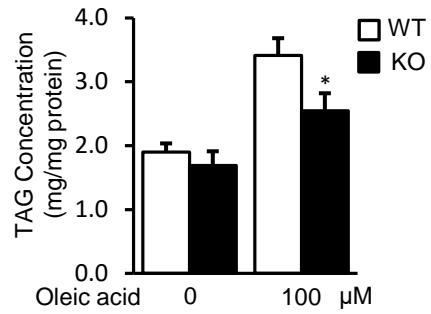

**Supplementary Figure S3. Loss of SRA prevents the oleic acids induced TAG accumulation in hepatocytes.** Hepatocytes isolated from SRAKO (KO, n=8) or WT (n=8) littermates (7-8 weeks of age, chow diet) were treated without or with oleic acids (100 μM) for 24h. TAG concentration was assayed and normalized to cellular protein. The data are presented as the mean ± SE. \*p < 0.05.

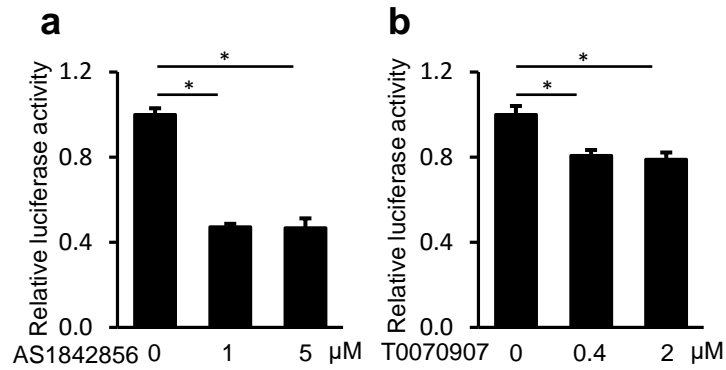

**Supplementary Figure S4. ATGL promoter activity is dependent on FoxO1 and PPAR $\gamma$ .** HepG2 cells were transfected with -3000/+1-LUC ATGL construct (200 ng) plus pRL-TK-*Renilla* (10 ng). 4 h after transfection, cells were treated with FoxO1 inhibitor, AS1842856 (a) or PPAR $\gamma$  inhibitor, T0070907 (b) with doses as indicated for 60 h before harvesting. ATGL promoter driven luciferase activity were normalized to *Renilla* luciferase activity. Data are expressed as fold-change relative to control and presented as the mean  $\pm$  SE. \*p < 0.05.

## Supplementary Table S1

Primers used in RT-qPCR for mRNA expression analyses

| Gene name     | Forward primer          | Reverse primer            |
|---------------|-------------------------|---------------------------|
| Ppara         | TACTGCCGTTTTCAACAAGTGC  | AGGTCGTGTTACAGGTAAGA      |
| Mcad          | ACCCTGTGGAGAAGCTGATG    | AGCAACAGTGCTTGGAGCTT      |
| Lcad          | CACTCAGATATTGTCATGCCCT  | TCCATTGAGAATCCAATCACTC    |
| Cpt1 $\alpha$ | CTGATGACGGCTATGGTGTTT   | GTGAGGCCAAACAAGGTGATA     |
| Cpt2          | GCCCAGCTTCCATCTTTACT    | CAGGATGTTGTGGTTTATCCGC    |
| Cd36          | GAACAGCAGCAAAAATCAAGG   | AAGACACAGTGTGGTCCTC       |
| Fatp1         | CGCTTTCTGCGTATCGTCTG    | GATGCACGGGATCGTGTCT       |
| L-fabp        | GTGGTCCGCAATGAGTTCAC    | GTATTGGTGATTGTGTCTCC      |
| Acs11         | TCTTGGTGTACTACTACGACGAT | CGAGAACCTAAACAAGGACCATT   |
| Acox1         | TAACCTCCTCACTCGAAGCCA   | AGTTCCATGACCCATCTCTGTC    |
| Acaa1b        | CAAGCCCGCGTCCTTAATTC    | AGGTGACCCAGCACTACCT       |
| Acaa2         | GACTCTCAAGCTGGAAGATAC   | ACCTCTGCTGAGACTGCAAG      |
| Atgl          | TTCACCATCCGCTTGTGGAG    | AGATGGTCACCCAATTTCTC      |
| Hsl           | GCTGGGCTGTCAAGCACTGT    | GTAAGTGGTAGGCTGCCAT       |
| Srebp1c       | AACGTCACTTCCAGCTAGAC    | CCAC-TAAGGTGCCTACAGAGC    |
| Ppar $\gamma$ | GGAAAGACAACGGACAAATCAC  | TACGGATCGAAACTGGCAC       |
| Acly          | ACCCTTTCACTGGGGATCACA   | GACAGGGATCAGGATTTCTTG     |
| Fasn          | TTGACGGCTCACACACCTAC    | CGATCTTCCAGGCTCTTCAG      |
| Acc1          | ATGGGCGGAATGGTCTCTTTC   | TGGGGACCTTGTCTTCATCAT     |
| Acc2          | CGCTCACCAACAGTAAGGTGG   | GCTTGGCAGGGAGTTCCTC       |
| Scd1          | GAAGTCCACGCTCGATCTCA    | TGGAGATCTCTTGGAGCATGTG    |
| Mtgp1         | ACGCTGA-GAGTGCCACATACT  | GAGAGATCGCTAC-AGCACCCAC   |
| Dgat1         | CGTGGTATCCTGA-ATTGGTG   | GGCGTCTCTCAATCTGAAAT      |
| Dgat2         | ATCTTCTCTGTCACCTGGCT    | ACCTTTCTTGGGCGTGTTC       |
| Apob          | CCAGAGTGTGGAGCTGAATGT   | TTGCTTTTTAGGGAGCCTAGC     |
| Mttp          | AGCCAGTGGGCATAGAAAATC   | GGTCACTTTACAATCCCCAGAG    |
| Apoc2         | ACCTGTACCAGAAGACATACCC  | CCTGCGTAAGTGCTCATGG       |
| Apoc3         | AGGCTACTGGAGCAAGTTTACT  | ATAGCTGGAGTTGGTTGGTCC     |
| Vldlr         | AGAGCCTGCCTCCATAGCTG    | CGCCCCAGTCTGACCAGTAA      |
| SRA(mouse)    | GGCGGGCTGGTGGTACTCG     | GCGTCGGCTGATATCATCACATACC |
| SRA(human)    | GCTAGGGCACTAGGTTGTCCG   | CGCCTGGCACTGCTGCAGGAAC    |
| 36B4          | AAGCGCGTCTTGGCATTGTCT   | CCGCAGGGGCAGCAGTGG        |

## Supplementary material to Figure 1b

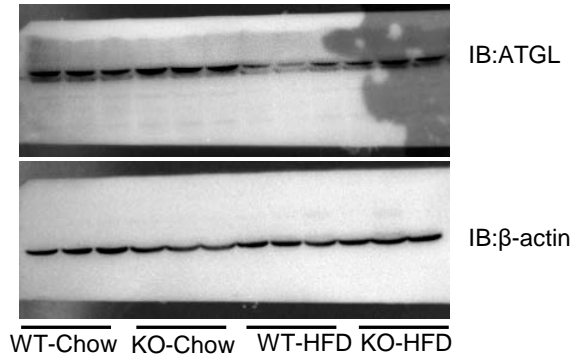

**Supplement  
ary material  
to Figure 2a**

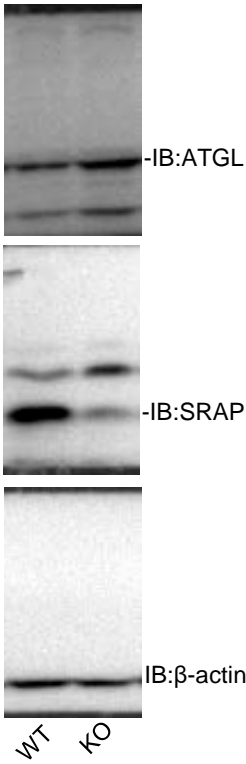

**Supplement  
ary material  
to Figure 2b**

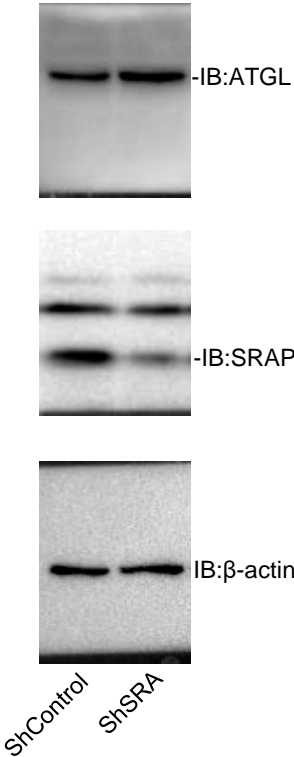

**Supplementa  
ry material to  
Figure 2c**

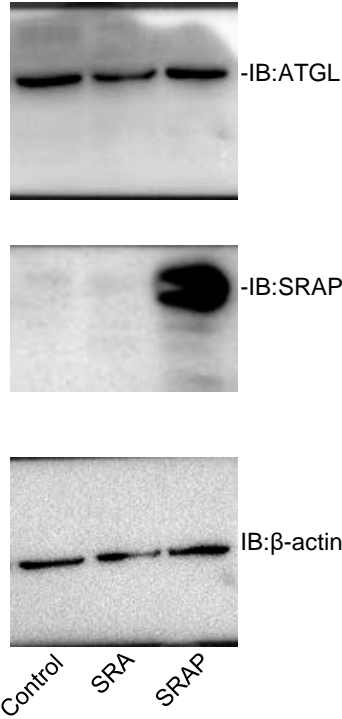



### Supplementary material to Figure 3b

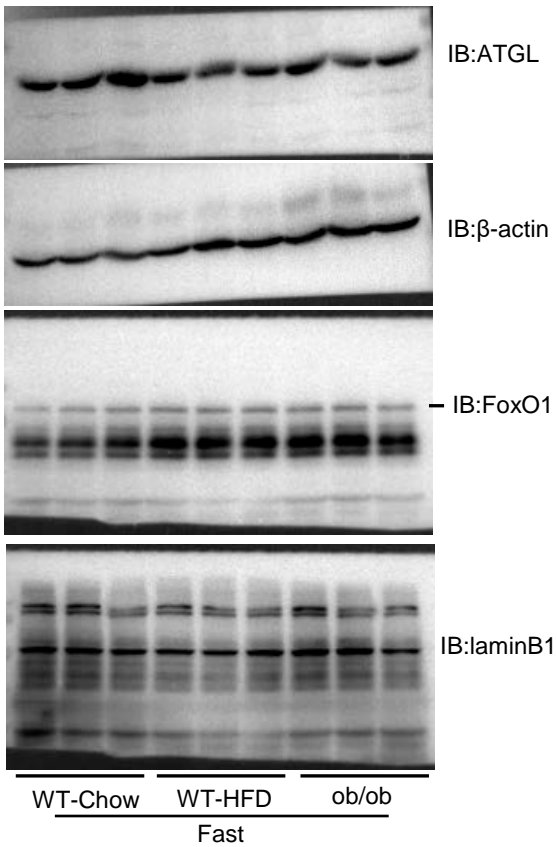

### Supplementary material to Figure 3c

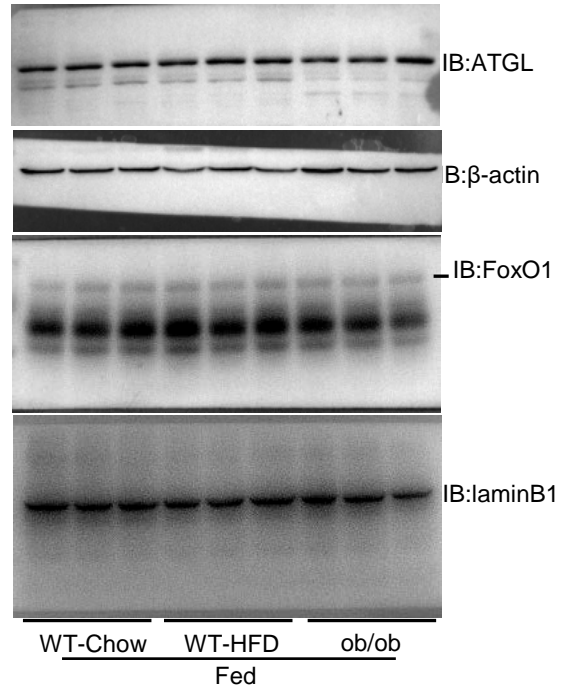

### Supplementary material to Figure 3d

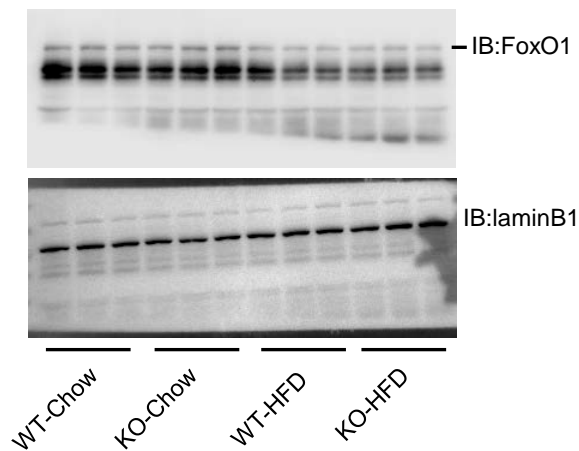

## Supplementary material to Figure 4a

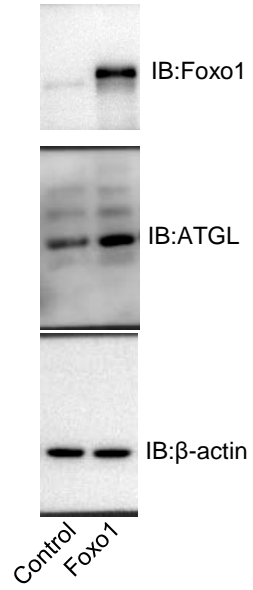

## Supplementary material to Figure 5a

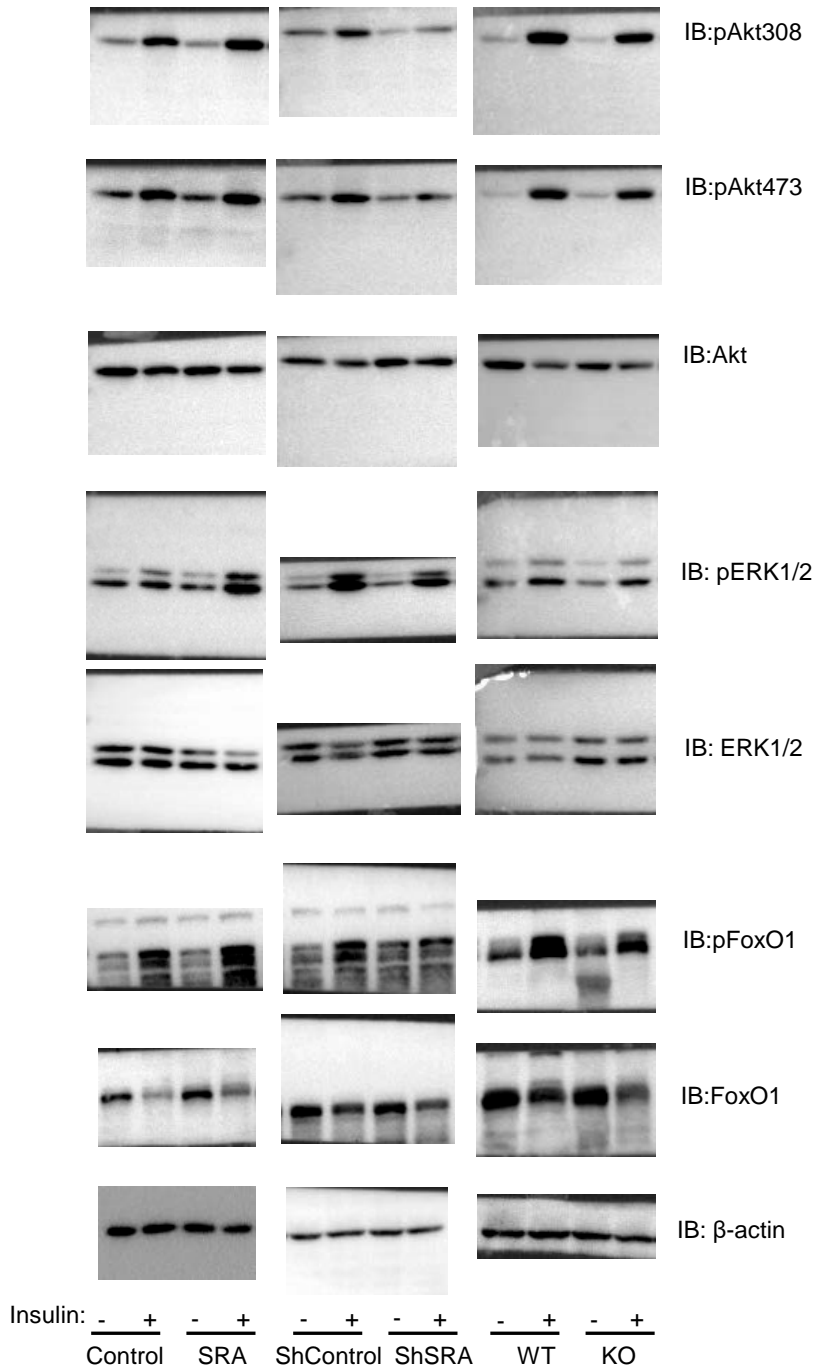

## Supplementary material to Figure 5b

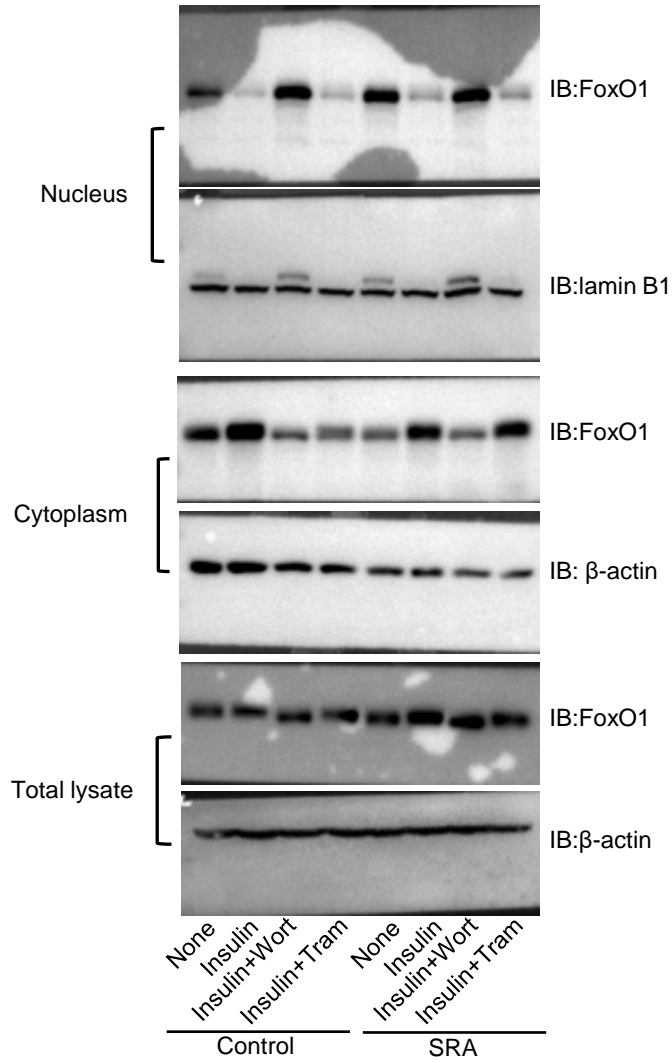

## Supplementary material to Figure 7a&b

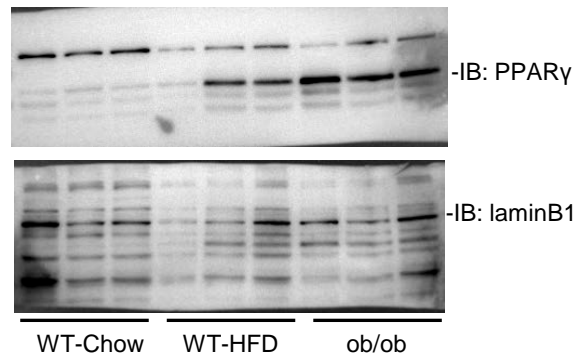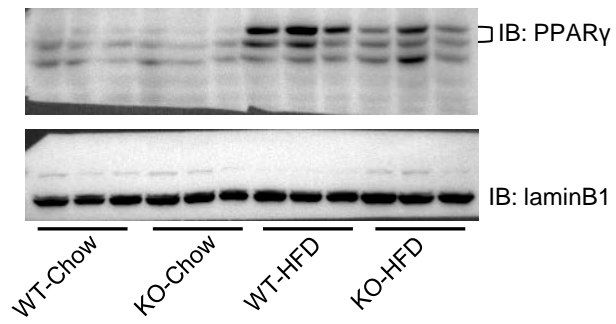

Supplement: srep35531-s1.pdf [file srep35531-s1.pdf]
